# Supplementary material for: An Improved Parameterization of Sea Spray-Mediated Heat Flux Using Gaussian Quadrature: Case Studies with a Coupled CFSv2.0-WW3 System
Source: Copernicus journal article supplement (doi:10.5194/gmd-2022-233), 2022-11-16
Supplement: Supplementary file 1 [file gmd-2022-233-supplement.pdf]

Supplementary material for

**An Improved Parameterization of Sea Spray-Mediated Heat Flux Using Gaussian Quadrature: Case Studies with a Coupled CFSv2.0-WW3 System**

Ruizi Shi<sup>1</sup> and Fanghua Xu<sup>1\*</sup>

<sup>1</sup>Department of Earth System Science, Ministry of Education Key Laboratory for Earth System Modeling, Institute for Global Change Studies, Tsinghua University, Beijing, 100084, China.

*Correspondence to:* Fanghua Xu ([fxu@mail.tsinghua.edu.cn](mailto:fxu@mail.tsinghua.edu.cn))

**Contents of this file**

Figures S1 to S6

**Introduction**

Figure S1 (Figure S2) are global 53-day averaged SST differences between SPRAY-A15 and OISST and the differences between SPRAY-GQ and SPRAY-A15 in Jan-Feb, 2017 (Aug-Sep, 2018).

Figure S3 (Figure S4) are global 53-day averaged WSP10 differences between SPRAY-A15 and ERA5 and the differences between SPRAY-GQ and SPRAY-A15 in Jan-Feb, 2017 (Aug-Sep, 2018).

Figure S5 (Figure S6) are global 53-day averaged SWH differences between SPRAY-A15 and ERA5 and the differences between SPRAY-GQ and SPRAY-A15 in Jan-Feb, 2017 (Aug-Sep, 2018).

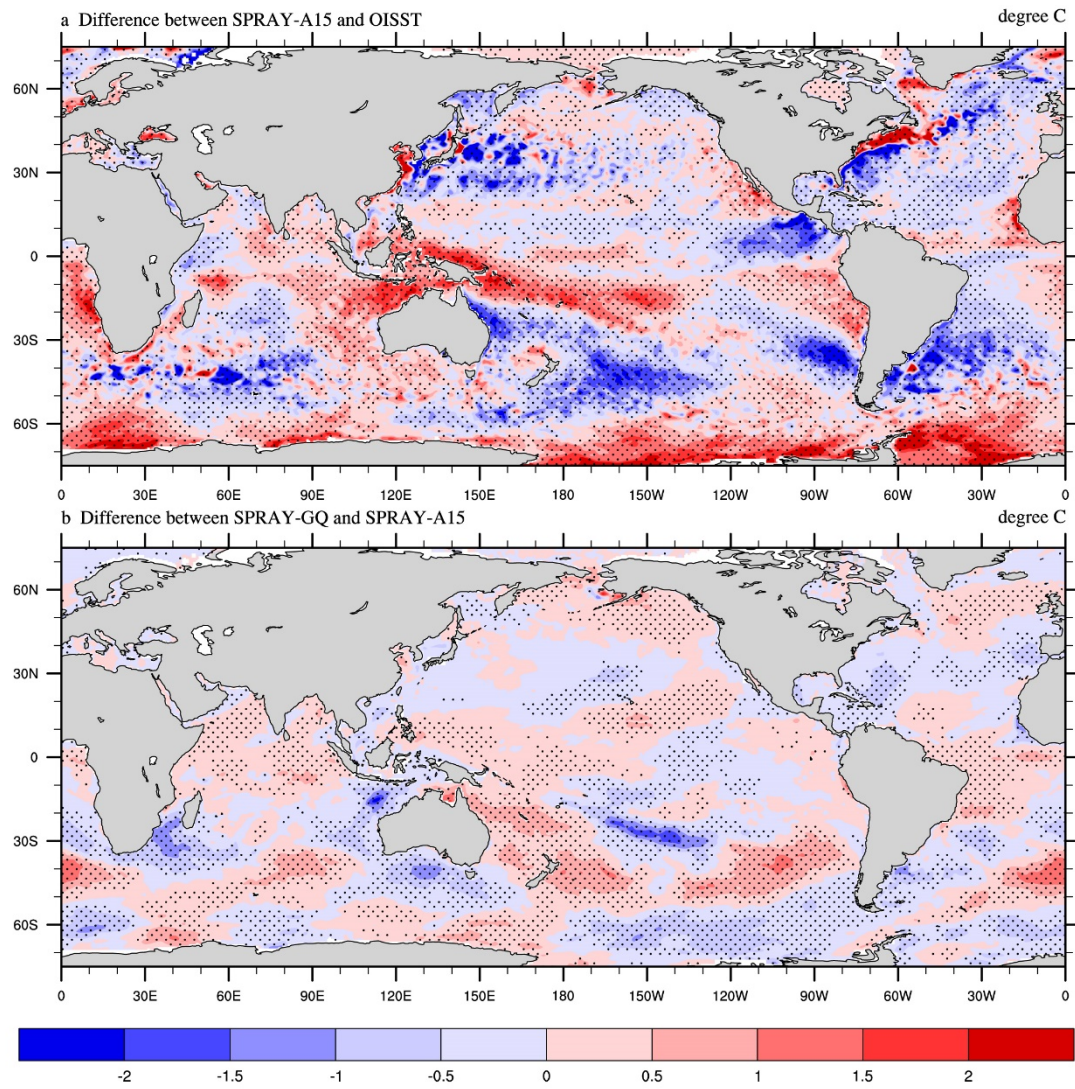

**Figure S1.** The global 53-day averaged SST ( $^{\circ}\text{C}$ ) differences between SPRAY-A15 and OISST (a; SPRAY-A15 minus OISST) and the differences between SPRAY-GQ and SPRAY-A15 (b; SPRAY-GQ minus SPRAY-A15) in Jan-Feb, 2017. The first 3-day simulation is discarded. The dotted areas are statistically significant at 95% confidence level.

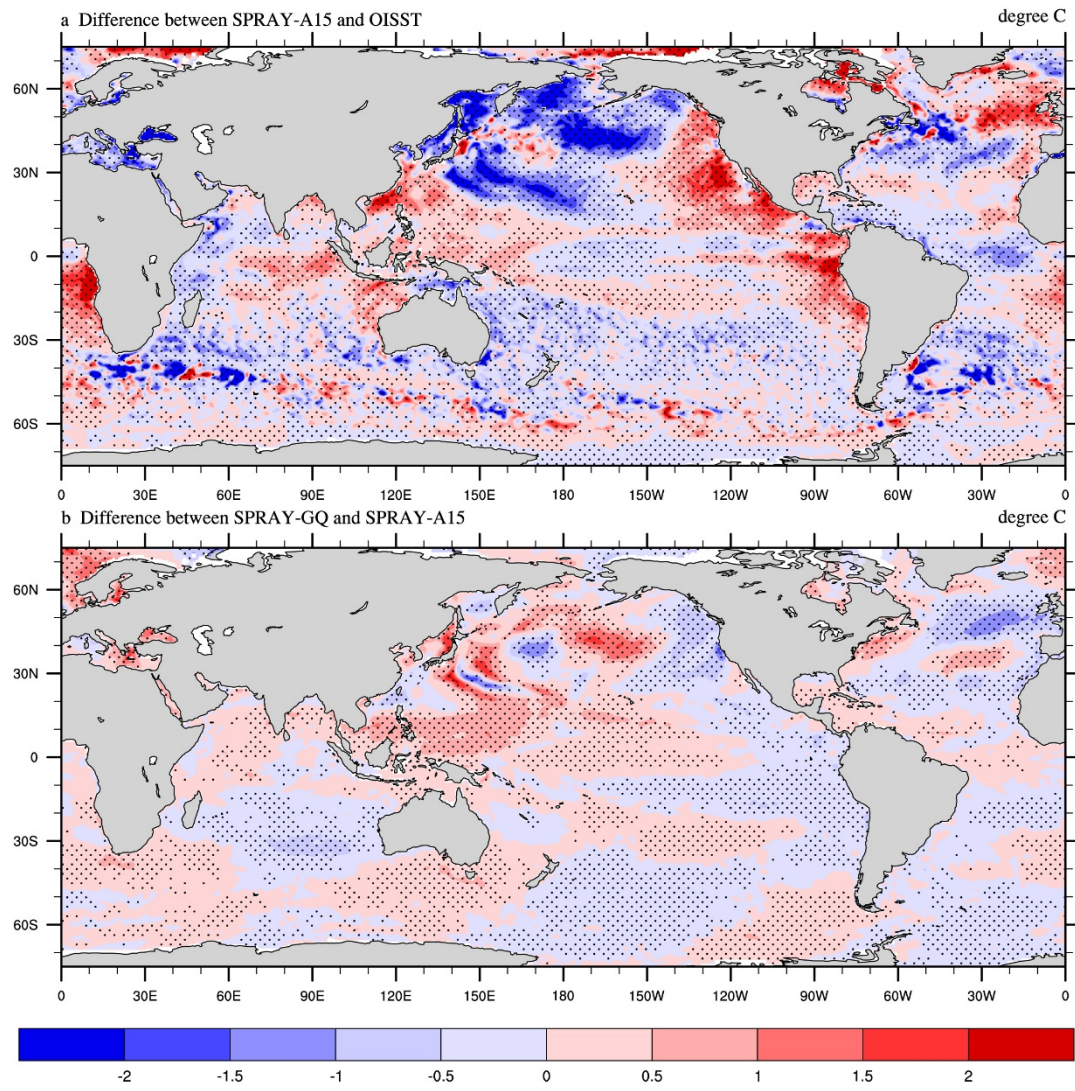

**Figure S2.** The same as Figure S1, but for Aug-Sep, 2018.



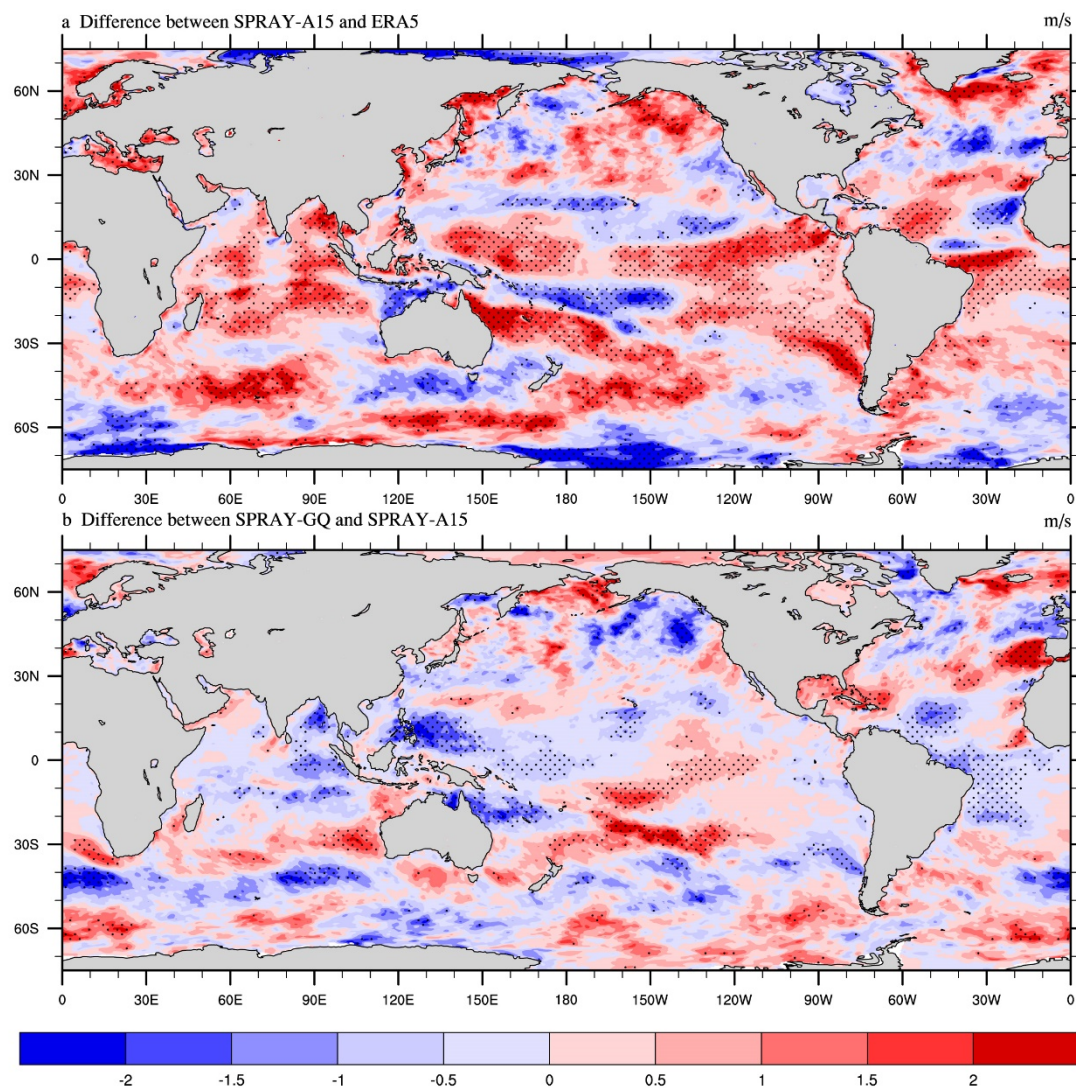

**Figure S3.** The global 53-day averaged WSP10 (m/s) differences between SPRAY-A15 and ERA5 (a; SPRAY-A15 minus ERA5), and the differences between SPRAY-GQ and SPRAY-A15 (b; SPRAY-GQ minus SPRAY-A15) in Jan-Feb, 2017. The first 3-day simulation is discarded. The dotted areas are statistically significant at 95% confidence level.



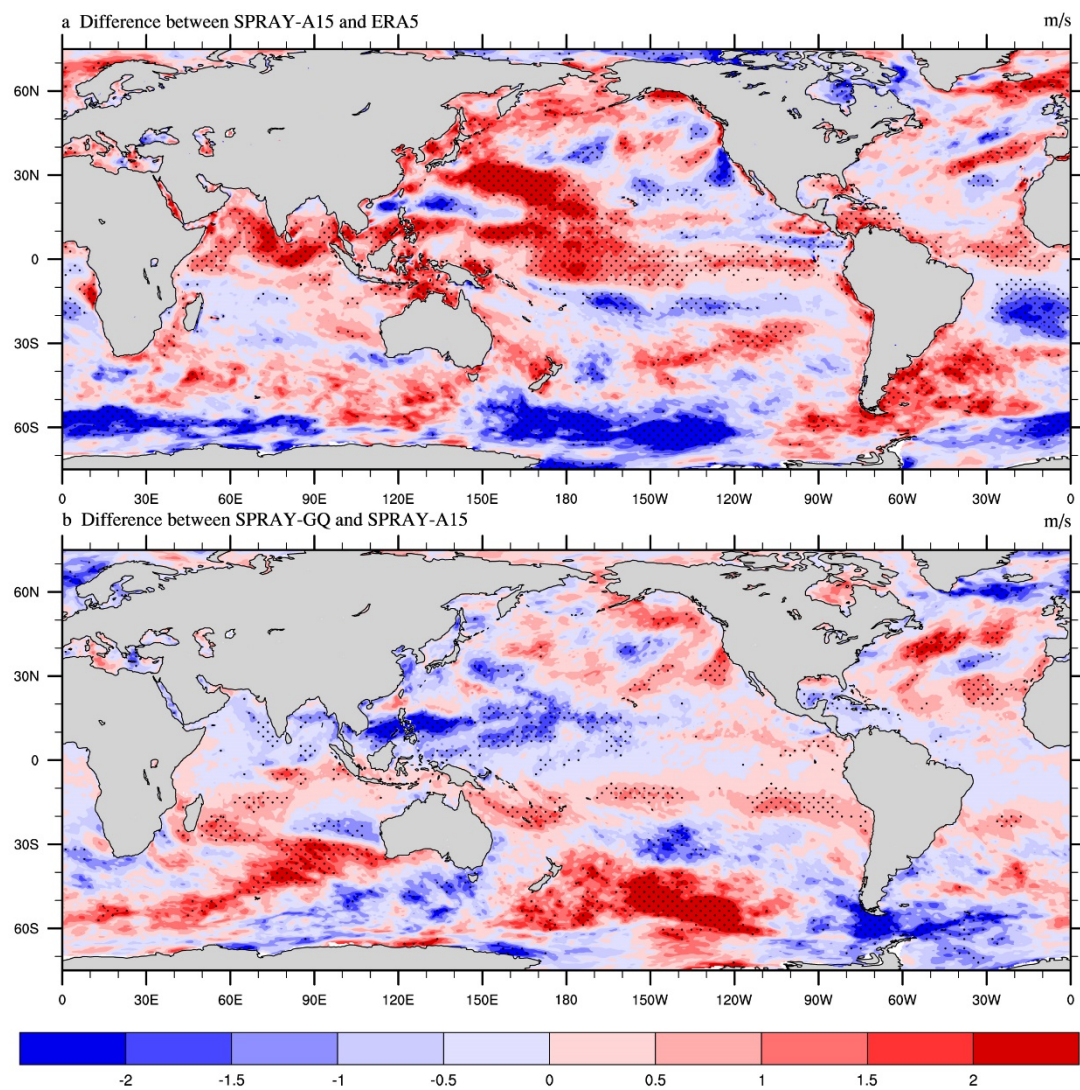

**Figure S4.** The same as Figure S3, but for Aug-Sep, 2018.

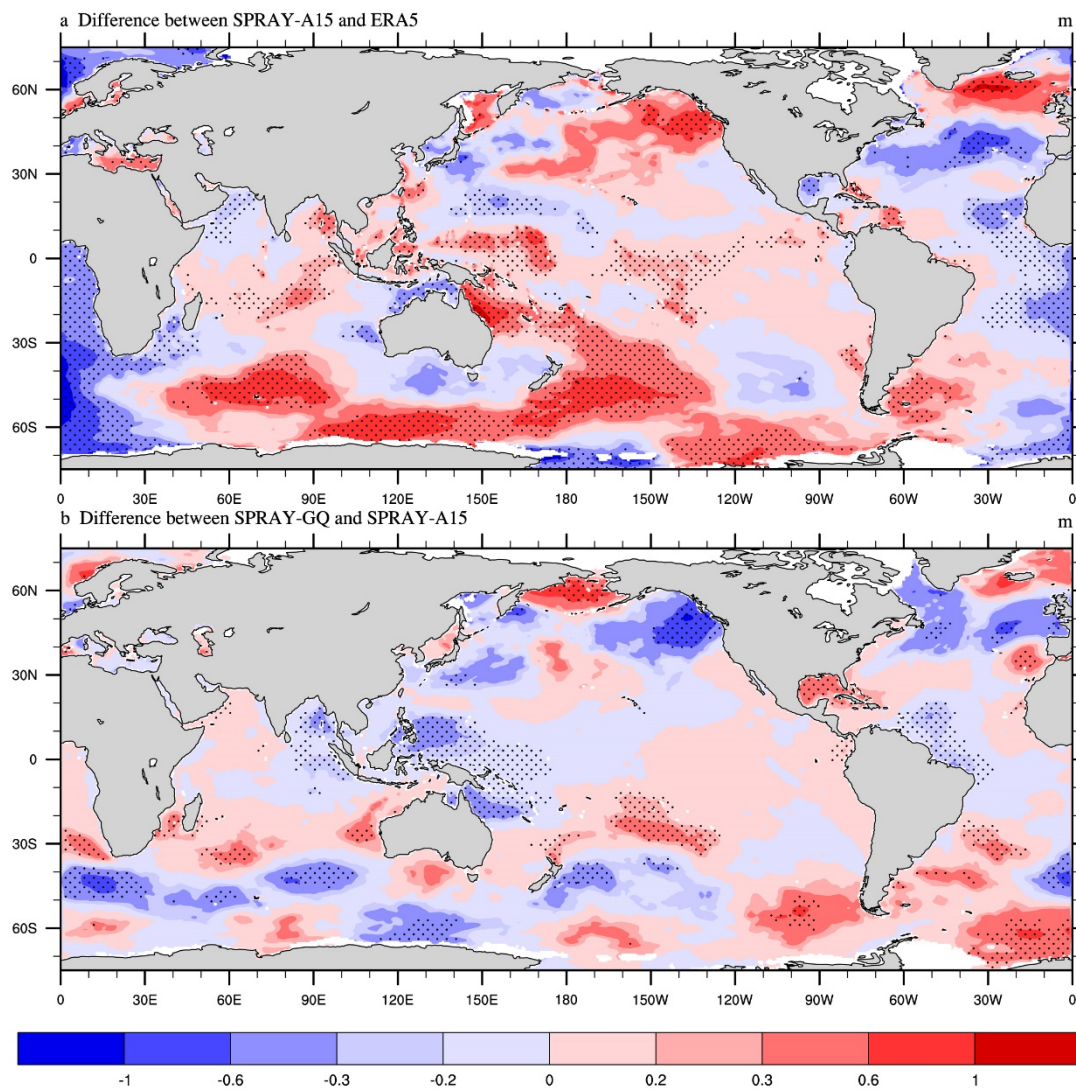

**Figure S5.** The global 53-day averaged SWH (m) differences between SPRAY-A15 and ERA5 (a; SPRAY-A15 minus ERA5), and the differences between SPRAY-GQ and SPRAY-A15 (b; SPRAY-GQ minus SPRAY-A15) in Jan-Feb, 2017. The first 3-day simulation is discarded. The dotted areas are statistically significant at 95% confidence level.

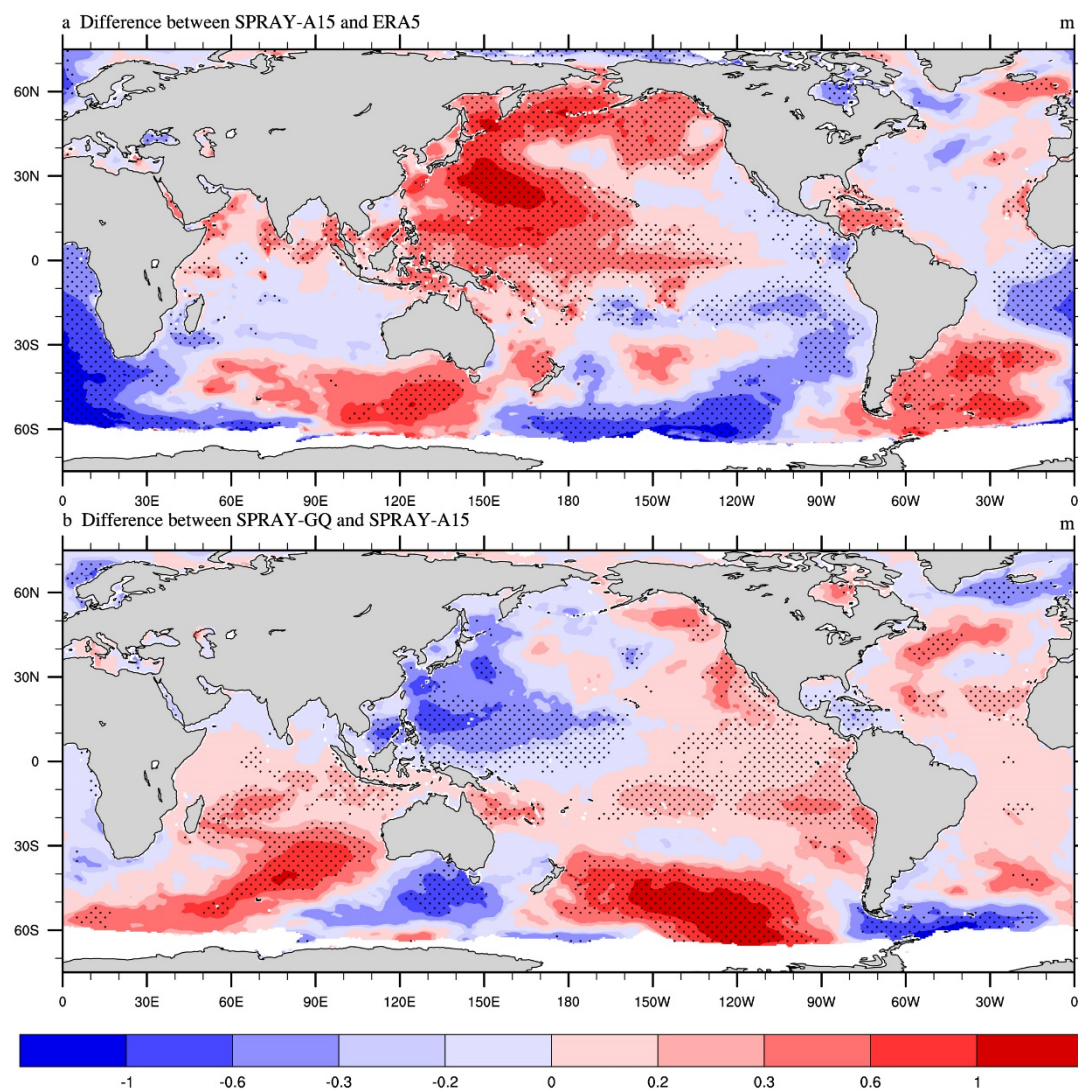

**Figure S6.** The same as Figure S5, but for Aug-Sep, 2018.
